# Supplementary material for: Designing less noble yet high-performing multimetallic catalysts for catalytic converters using a high-throughput approach
Source: Royal Society of Chemistry journal article supplement (doi:10.1039/d5cy01298h), 2026-01-01
Supplement: d5cy01298h1.pdf [file d5cy01298h1.pdf]

Supplementary Materials for

**Designing less noble yet high-performing multimetallic catalysts for catalytic converters using a high-throughput approach**

Son Dinh Le,<sup>a,b</sup> Nhan Nu Thanh Ton,<sup>a</sup> Panitha Phulkerd,<sup>a</sup> Poulami Mukherjee,<sup>a</sup> Naoto Nagata<sup>c</sup>, and Toshiaki Taniike<sup>\*a</sup>

<sup>a</sup>Graduate School of Advanced Science and Technology, Japan Advanced Institute of Science and Technology (JAIST), 1-1 Asahidai, Nomi, Ishikawa 923-1292, Japan.

<sup>b</sup>Department of Chemistry, University of Liverpool, Crown Street, Liverpool, L69 7ZD, United Kingdom.

Table S1. List of chemicals used in the present research

| Chemical                                                      | Formula                                       | Supplier       | MW (g/mol) | Purity |
|---------------------------------------------------------------|-----------------------------------------------|----------------|------------|--------|
| Iridium (III) acetylacetonate                                 | $\text{Ir}(\text{C}_5\text{H}_7\text{O}_2)_3$ | Sigma Aldrich  | 489.54     | 97     |
| Palladium (II) acetylacetonate                                | $\text{Pd}(\text{C}_5\text{H}_7\text{O}_2)_2$ | Sigma Aldrich  | 304.64     | 99     |
| Bis(acetylacetonato)platinum (II)                             | $\text{Pt}(\text{C}_5\text{H}_7\text{O}_2)_2$ | Wako Chemical  | 393.3      | 98     |
| Rhodium (III) acetylacetonate                                 | $\text{Rh}(\text{C}_5\text{H}_7\text{O}_2)_3$ | Sigma Aldrich  | 400.23     | 97     |
| Silver acetylacetonate                                        | $\text{Ag}(\text{C}_5\text{H}_7\text{O}_2)$   | Sigma Aldrich  | 206.98     | 98     |
| Cobalt (II) acetylacetonate                                   | $\text{Co}(\text{C}_5\text{H}_7\text{O}_2)_2$ | Sigma Aldrich  | 257.15     | 97     |
| Nickel (II) acetylacetonate                                   | $\text{Ni}(\text{C}_5\text{H}_7\text{O}_2)_2$ | Sigma Aldrich  | 256.91     | 95     |
| Iron (III) acetylacetonate                                    | $\text{Fe}(\text{C}_5\text{H}_7\text{O}_2)_3$ | Sigma Aldrich  | 353.17     | 97     |
| Indium (III) acetylacetonate                                  | $\text{In}(\text{C}_5\text{H}_7\text{O}_2)_3$ | Sigma Aldrich  | 412.14     | 99.99  |
| Chromium (III) acetylacetonate                                | $\text{Cr}(\text{C}_5\text{H}_7\text{O}_2)_3$ | Sigma Aldrich  | 349.32     | 99.99  |
| Manganese (II) acetylacetonate                                | $\text{Mn}(\text{C}_5\text{H}_7\text{O}_2)_2$ | Sigma Aldrich  | 253.15     | 100    |
| Ruthenium (III) acetylacetonate                               | $\text{Ru}(\text{C}_5\text{H}_7\text{O}_2)_3$ | Sigma Aldrich  | 398.39     | 97     |
| Copper (III) acetylacetonate                                  | $\text{Cu}(\text{C}_5\text{H}_7\text{O}_2)_2$ | Sigma Aldrich  | 261.76     | 99.9   |
| Poly(vinylpyrrolidone) K30                                    | $(\text{C}_6\text{H}_9\text{NO})_n$           | Wako Chemical  | 40,000     |        |
| 1-methyl-2-pyrrolidone, anhydrous                             | $\text{C}_5\text{H}_9\text{NO}$               | Sigma Aldrich  | 99.13      | 99.5   |
| Triethylene glycol                                            | $\text{C}_6\text{H}_{14}\text{O}_4$           | Alfa Aesar     | 150.17     | 99     |
| Lithium triethylborohydride                                   | $\text{Li}(\text{C}_2\text{H}_5)_3\text{BH}$  | Sigma Aldrich  | 105.95     |        |
| Methanol                                                      | $\text{CH}_3\text{OH}$                        | Kanto Chemical | 32.04      | 99.8   |
| Hexane                                                        | $\text{CH}_3(\text{CH}_2)_4\text{CH}_3$       | Kanto Chemical | 86.18      | 96.0   |
| $\text{CeO}_2\text{-ZrO}_2$ (6:4 mole ratio based on oxides)* |                                               |                |            |        |

**\*Preparation of  $\text{CeO}_2\text{-ZrO}_2$ :** The  $\text{CeO}_2\text{-ZrO}_2$  oxide (6:4 mole ratio based on oxides) was prepared by a coprecipitation method.  $\text{Ce}(\text{NO}_3)_3 \cdot 6\text{H}_2\text{O}$  (Nacalai Tesque) and  $\text{ZrO}(\text{NO}_3)_2 \cdot 2\text{H}_2\text{O}$  (Nacalai Tesque) were dissolved in deionized (DI) water. The pH of the solution was adjusted by adding aqueous ammonia solution until the pH reached 10. The solution was stirred for 12 h, and the precipitate was collected through centrifugation and washed with DI water until the supernatant was neutral. The resulting precipitate was dried at 110 °C and calcined in air at 973 K for 5 h.

Table S2. List of catalysts<sup>a</sup> and their T<sub>50</sub><sup>b</sup> for NO reduction, CO and C<sub>3</sub>H<sub>6</sub> oxidation

| No. | Catalyst       | T50_NO | T50_CO | T50_C <sub>3</sub> H <sub>6</sub> |
|-----|----------------|--------|--------|-----------------------------------|
| 1   | Ru             | 500.0  | 354.9  | 382.1                             |
| 2   | Rh             | 308.6  | 281.4  | 303.5                             |
| 3   | Pd             | 295.0  | 283.7  | 285.0                             |
| 4   | Pt             | 338.8  | 345.5  | 321.7                             |
| 5   | Cr–Cr–Cr–Pd–Pd | 329.4  | 287.5  | 293.2                             |
| 6   | Cr–Pt–Pt–Pt–Pt | 500.0  | 393.0  | 413.0                             |
| 7   | Mn–Rh          | 500.0  | 274.0  | 300.0                             |
| 8   | Mn–Pt          | 358.2  | 325.0  | 335.0                             |
| 9   | Mn–Mn–Pt–Pt–Pt | 500.0  | 356.4  | 368.0                             |
| 10  | Mn–Pd–Pd–Pd    | 308.6  | 275.3  | 276.3                             |
| 11  | Mn–Pt–Pt–Pt    | 500.0  | 336.5  | 344.9                             |
| 12  | Mn–Rh–Rh–Rh–Rh | 322.6  | 255.0  | 286.0                             |
| 13  | Fe–Pt–Pt       | 500.0  | 351.4  | 368.8                             |
| 14  | Co–Pt–Pt       | 394.4  | 334.1  | 346.6                             |
| 15  | Co–Pt–Pt–Pt    | 358.9  | 327.9  | 328.2                             |
| 16  | Co–Rh–Rh–Rh–Rh | 500.0  | 270.0  | 301.0                             |
| 17  | Ni–Pd          | 311.1  | 257.0  | 272.0                             |
| 18  | Cu–Rh          | 311.6  | 293.0  | 317.0                             |
| 19  | Cu–Pd          | 340.8  | 305.0  | 310.0                             |
| 20  | Cu–Pt          | 386.4  | 328.3  | 331.4                             |
| 21  | Cu–Pt–Pt       | 500.0  | 372.8  | 371.4                             |
| 22  | Cu–Pd–Pd–Pd–Pd | 296.3  | 288.7  | 290.1                             |
| 23  | Ru–Ru–Ru–Ru–Pd | 332.1  | 270.8  | 287.1                             |
| 24  | Ru–Ru–Ag       | 500.0  | 350.6  | 364.8                             |
| 25  | Ru–Rh          | 500.0  | 363.1  | 373.8                             |
| 26  | Ru–Pd          | 308.8  | 266.0  | 283.0                             |
| 27  | Ru–Pt          | 328.3  | 300.7  | 286.1                             |
| 28  | Rh–Pd          | 275.9  | 259.0  | 268.0                             |
| 29  | Rh–Pt          | 287.5  | 274.0  | 286.0                             |
| 30  | Rh–Pd–Pd–Pd–Pd | 276.0  | 235.0  | 246.0                             |
| 31  | Rh–Pt–Pt–Pt–Pt | 377.3  | 322.3  | 342.2                             |
| 32  | Pd–Pd–Pd–Pd–In | 314.8  | 269.0  | 273.0                             |
| 33  | Pd–Pd–In       | 356.9  | 296.4  | 304.1                             |
| 34  | Pd–In          | 357.2  | 298.0  | 307.0                             |
| 35  | Pd–Pt          | 293.4  | 253.0  | 265.0                             |
| 36  | Pd–Pt–Pt       | 316.1  | 262.4  | 272.3                             |
| 37  | Pd–Pt–Pt–Pt–Pt | 332.8  | 287.4  | 297.2                             |
| 38  | Ag–Pt–Pt       | 339.4  | 289.4  | 295.4                             |
| 39  | Ag–Pt–Pt–Pt    | 500.0  | 339.3  | 344.4                             |
| 40  | In–Pt          | 500.0  | 328.4  | 357.8                             |

|    |                |       |       |       |
|----|----------------|-------|-------|-------|
| 41 | In-Pt-Pt       | 500.0 | 383.2 | 417.6 |
| 42 | Cr-Cr-Pd-Pt    | 297.8 | 251.2 | 262.2 |
| 43 | Cr-Cr-Rh-Rh-In | 397.2 | 355.3 | 357.8 |
| 44 | Cr-Cr-Rh-Pd-Pd | 299.3 | 252.8 | 262.3 |
| 45 | Cr-Cr-Pd-Pd-Ag | 315.8 | 307.6 | 293.2 |
| 46 | Cr-Pd-Pt-Pt    | 355.7 | 274.9 | 284.1 |
| 47 | Cr-Co-Pd-Pd-Pd | 369.3 | 323.5 | 329.9 |
| 48 | Cr-Ni-Ni-Pt-Pt | 500.0 | 323.3 | 371.0 |
| 49 | Cr-Cu-Pt-Pt-Pt | 500.0 | 339.0 | 360.0 |
| 50 | Mn-Mn-Mn-Pd-Pt | 385.9 | 349.5 | 358.7 |
| 51 | Mn-Mn-Ru-Ru-Pt | 500.0 | 382.2 | 395.6 |
| 52 | Mn-Rh-Pd       | 305.4 | 266.0 | 278.0 |
| 53 | Mn-Rh-Ag       | 372.0 | 280.0 | 308.0 |
| 54 | Mn-Pd-Pt       | 313.1 | 261.0 | 275.0 |
| 55 | Mn-Ni-Pt-Pt    | 500.0 | 321.0 | 337.3 |
| 56 | Mn-Ni-Pt-Pt-Pt | 398.9 | 339.9 | 353.0 |
| 57 | Mn-Cu-Pd-Pd-Pd | 318.4 | 288.0 | 291.0 |
| 58 | Fe-Fe-Cu-Ag-Ag | 500.0 | 299.0 | 353.0 |
| 59 | Fe-Fe-Ru-Rh-Rh | 500.0 | 294.0 | 313.0 |
| 60 | Fe-Ru-Pd       | 311.0 | 265.0 | 282.0 |
| 61 | Fe-Rh-Pd       | 299.0 | 258.0 | 283.0 |
| 62 | Fe-Rh-Pt       | 296.7 | 261.0 | 284.0 |
| 63 | Fe-Pd-Pt       | 303.6 | 291.0 | 294.0 |
| 64 | Co-Ru-Pd       | 327.3 | 293.0 | 301.0 |
| 65 | Co-Ru-Pt       | 339.0 | 287.0 | 328.0 |
| 66 | Co-Rh-Pd       | 314.3 | 283.0 | 298.0 |
| 67 | Co-Rh-Pt       | 308.1 | 272.0 | 292.0 |
| 68 | Co-Pd-Pt       | 301.2 | 276.0 | 285.0 |
| 69 | Co-Ag-Ag-Pt    | 500.0 | 347.0 | 379.0 |
| 70 | Co-Pd-Pt-Pt-Pt | 325.6 | 285.2 | 288.1 |
| 71 | Co-Ag-Ag-Pt-Pt | 500.0 | 322.3 | 407.7 |
| 72 | Ni-Ni-Ni-Ru-Pt | 312.9 | 290.7 | 297.1 |
| 73 | Ni-Ni-Ag-Pt-Pt | 335.5 | 330.7 | 318.2 |
| 74 | Ni-Ru-Pd       | 323.6 | 278.0 | 291.0 |
| 75 | Ni-Rh-Pd       | 298.2 | 257.0 | 285.0 |
| 76 | Ni-Rh-Pt       | 296.9 | 244.0 | 272.0 |
| 77 | Ni-Pd-Pt       | 311.7 | 258.0 | 273.0 |
| 78 | Ni-Ir-Pt       | 397.1 | 304.0 | 348.0 |
| 79 | Ni-Ru-Pd-Pd-Pd | 284.1 | 265.7 | 274.8 |
| 80 | Cu-Ru-Pd       | 298.5 | 259.5 | 262.6 |
| 81 | Cu-Ru-Pt       | 500.0 | 391.8 | 405.1 |
| 82 | Cu-Rh-Pd       | 307.3 | 266.0 | 291.0 |

|     |                |       |       |       |
|-----|----------------|-------|-------|-------|
| 83  | Cu–Rh–Pt       | 305.8 | 264.0 | 287.0 |
| 84  | Cu–Pd–Pt       | 327.5 | 287.0 | 297.0 |
| 85  | Cu–In–Pt–Pt    | 395.9 | 327.0 | 365.6 |
| 86  | Cu–Pd–Pd–Pd–Ag | 282.1 | 255.8 | 250.7 |
| 87  | Ru–Rh–Pd       | 304.6 | 272.0 | 293.0 |
| 88  | Ru–Rh–Pt       | 309.8 | 264.0 | 289.0 |
| 89  | Ru–Pd–Pt       | 321.3 | 268.0 | 289.0 |
| 90  | Ru–Pd–In–In    | 500.0 | 341.5 | 355.6 |
| 91  | Ru–Pd–Pd–Pd–Pt | 287.0 | 256.6 | 253.5 |
| 92  | Ru–Ag–In–In–In | 500.0 | 396.0 | 402.0 |
| 93  | Rh–Pd–Pt       | 273.4 | 264.0 | 268.0 |
| 94  | Rh–Ag–In       | 500.0 | 360.0 | 359.0 |
| 95  | Rh–Ag–Pt       | 500.0 | 277.3 | 322.5 |
| 96  | Rh–Pd–Pt–Pt–Pt | 333.1 | 265.9 | 282.0 |
| 97  | Rh–Ag–In–In–In | 500.0 | 381.0 | 393.0 |
| 98  | Pd–Pd–Ag–Pt–Pt | 338.5 | 303.5 | 315.2 |
| 99  | Pd–In–Pt       | 500.0 | 266.0 | 315.9 |
| 100 | Pd–Ag–Ag–Ag–Pt | 338.9 | 276.0 | 290.3 |
| 101 | Pd–In–Pt–Pt–Pt | 377.8 | 340.0 | 345.9 |
| 102 | Cr–Mn–Mn–Ru–Pd | 339.5 | 283.7 | 294.0 |
| 103 | Cr–Mn–Ag–Ag–In | 500.0 | 350.0 | 363.0 |
| 104 | Cr–Ru–Pd–Ag–Ag | 284.6 | 260.1 | 253.4 |
| 105 | Cr–Pd–Ag–Ag–Pt | 500.0 | 350.0 | 363.0 |
| 106 | Cr–Pd–In–In–Pt | 329.3 | 286.7 | 292.2 |
| 107 | Mn–Mn–Ni–Ru–Pd | 311.6 | 295.2 | 283.5 |
| 108 | Mn–Co–Pd–Pt    | 319.6 | 288.7 | 288.9 |
| 109 | Mn–Cu–Ru–Rh    | 500.0 | 284.0 | 317.0 |
| 110 | Mn–Fe–Ru–Pt–Pt | 500.0 | 297.9 | 358.7 |
| 111 | Mn–Cu–Ru–Ru–Pd | 317.1 | 283.9 | 284.5 |
| 112 | Mn–Cu–Rh–Pt–Pt | 348.7 | 306.0 | 314.0 |
| 113 | Mn–Rh–Ag–In–In | 500.0 | 335.0 | 351.0 |
| 114 | Fe–Co–Rh–Pd    | 323.3 | 288.0 | 305.0 |
| 115 | Fe–Cu–Rh–Pd    | 330.3 | 261.0 | 298.0 |
| 116 | Fe–Rh–Pd–Pt    | 316.8 | 278.0 | 296.0 |
| 117 | Fe–Co–Pd–Pd–In | 384.1 | 341.9 | 343.0 |
| 118 | Fe–Cu–Rh–Ag–Ag | 354.8 | 269.0 | 309.0 |
| 119 | Co–Cu–Rh–Pd    | 314.0 | 284.0 | 297.0 |
| 120 | Co–Ru–Ag–Pt–Pt | 500.0 | 379.8 | 406.5 |
| 121 | Ni–Pd–Ag–Pt–Pt | 270.7 | 240.2 | 241.8 |
| 122 | Ni–Pd–In–Pt–Pt | 500.0 | 358.4 | 371.1 |
| 123 | Cu–Rh–Pd–Pt    | 318.4 | 291.0 | 317.0 |
| 124 | Ru–Rh–Pd–In    | 291.9 | 255.6 | 259.3 |
| 125 | Ru–Pd–In–Pt    | 361.6 | 290.5 | 308.9 |

|     |                |       |       |       |
|-----|----------------|-------|-------|-------|
| 126 | Ru–Rh–In–Pt–Pt | 500.0 | 317.2 | 344.2 |
| 127 | Rh–Ag–In–Ir    | 500.0 | 347.0 | 365.0 |
| 128 | Cr–Mn–Pd–In–Pt | 500.0 | 371.6 | 373.0 |
| 129 | Cr–Ru–Rh–Pd–Pt | 311.4 | 264.0 | 287.0 |
| 130 | Mn–Ni–Cu–Ru–Pd | 339.5 | 322.6 | 314.0 |
| 131 | Mn–Ru–Rh–Pd–Pt | 315.1 | 287.0 | 311.0 |
| 132 | Mn–Pd–In–Ir–Pt | 398.8 | 312.0 | 335.0 |
| 133 | Fe–Co–Ni–Pd–Pt | 332.8 | 313.0 | 317.0 |
| 134 | Fe–Co–Rh–Pd–Pt | 339.5 | 281.0 | 325.0 |
| 135 | Fe–Ni–Rh–Pd–Pt | 313.2 | 313.0 | 311.0 |
| 136 | Co–Ni–Rh–Pd–Pt | 326.2 | 275.0 | 315.0 |
| 137 | Co–Rh–Pd–Ag–Pt | 334.6 | 286.0 | 328.0 |
| 138 | Ni–Rh–Pd–In–Pt | 298.9 | 294.0 | 296.0 |
| 139 | Ru–Rh–Pd–Ag–Pt | 334.3 | 297.0 | 345.0 |
| 140 | Rh–Pd–Ag–Ir–Pt | 320.9 | 283.0 | 318.0 |

<sup>a</sup>Catalyst compositions are denoted by their elemental symbols, and it should be noted that they assume an equal molar ratio among components. Repeated symbols indicate a proportional increase in the molar ratio of that element. For example, the designation M1–M2 represents a 50:50 molar ratio, M1–M2–M3–M4–M5 is 20% for each element, and M1–M1–M2–M3 has a 50% molar ratio for M1 with 25% each for M2 and M3.

<sup>b</sup>The  $T_{50}$  values, representing the temperatures corresponding to 50% conversion, were derived by interpolating the acquired conversions at discrete temperature points. When a catalyst did not reach 50% conversion up to 400 °C, the  $T_{50}$  value was assigned as 500 °C.

Table S3. Abundance values<sup>a</sup> of all the used elements and its log to the base 10

| Element | Abundance (ppm) | log(A) |
|---------|-----------------|--------|
| Cr      | 102             | 2.0    |
| Mn      | 950             | 3.0    |
| Fe      | 56300           | 4.8    |
| Co      | 25              | 1.4    |
| Ni      | 84              | 1.9    |
| Cu      | 60              | 1.8    |
| Ru      | 0.001           | –3.0   |
| Rh      | 0.001           | –3.0   |
| Pd      | 0.015           | –1.8   |
| Ag      | 0.075           | –1.1   |
| In      | 0.25            | –0.6   |
| Ir      | 0.001           | –3.0   |
| Pt      | 0.005           | –2.3   |

<sup>a</sup>Haynes WM, Lide DR, Bruno TJ, editors. Geophysics, Astronomy, and Acoustics. In: CRC Handbook of Chemistry and Physics. 97th edn CRC Press; 2016.

Table S4. Performance comparison of classification models evaluated on the same training–testing split (Class 0 vs Class 3).

| Model                               | F1-score |
|-------------------------------------|----------|
| XGBoost                             | 0.9474   |
| Logistic regression                 | 0.9000   |
| Support vector machine (RBF kernel) | 0.9000   |
| Random forest                       | 0.8889   |
| k-nearest neighbours (k = 7)        | 0.6316   |

Note: Feature scaling was applied where required (SVM, logistic regression, k-NN), while XGBoost model was used without scaling.

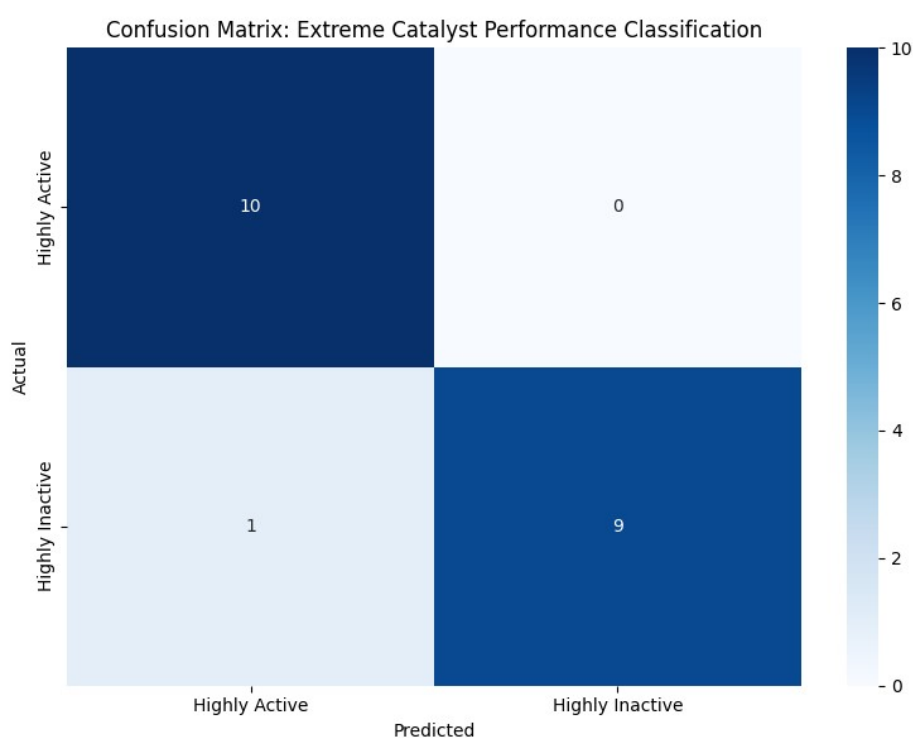

Fig. S1 Confusion matrix showing the accuracy of the classification model on the two extreme performance classes, i.e., class 0 (270.7–313.2 °C) and class 3 (398.9–500 °C).

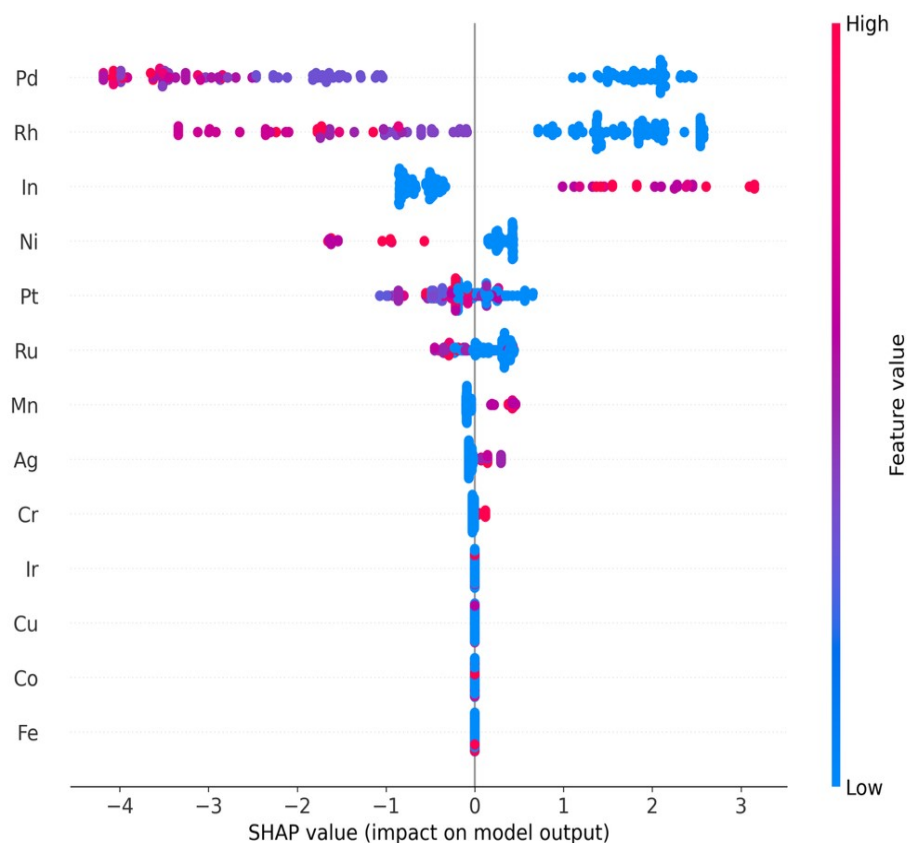

Fig. S2 SHAP beeswarm plot obtained using all 140 catalyst samples (Jenks Classes 0–3), evaluated with the XGBoost model trained on extreme performers (Class 0 vs Class 3). The feature importance ranking and qualitative trends closely match those observed in Fig. 7 in the main MS, demonstrating the robustness of the SHAP-based interpretation.
